# Supplementary material for: Higher mortality rates amongst emergency patients admitted to hospital at weekends reflect a lower probability of admission
Source: PubMed Central journal article supplement — J Health Serv Res Policy. 2016 May 6;22(1):12–9. doi: 10.1177/1355819616649630 (PMC5482385; doi:10.1177/1355819616649630), 2016-05-06
Supplement: HSR649630_supplementary_material.pdf [file HSR649630_supplementary_material.pdf]

## Appendices

### Appendix 1: Descriptive statistics for patients attending A&E

| Variable                            | Weekday<br>n | Weekend<br>n | Weekday<br>% | Weekend<br>% |
|-------------------------------------|--------------|--------------|--------------|--------------|
|                                     | 9,074,928    | 3,595,860    | 100.00       | 100.00       |
| Female                              | 4,518,407    | 1,786,423    | 49.79        | 49.68        |
| <i>Age category</i>                 |              |              |              |              |
| <1 year                             | 234,133      | 103,920      | 2.58         | 2.89         |
| 1-4 years                           | 613,465      | 283,354      | 6.76         | 7.88         |
| 5-9 years                           | 387,499      | 163,612      | 4.27         | 4.55         |
| 10-14 years                         | 464,636      | 151,745      | 5.12         | 4.22         |
| 15-19 years                         | 572,628      | 239,844      | 6.31         | 6.67         |
| 20-24 years                         | 735,069      | 321,829      | 8.1          | 8.95         |
| 25-29 years                         | 676,990      | 278,679      | 7.46         | 7.75         |
| 30-34 years                         | 589,870      | 235,169      | 6.5          | 6.54         |
| 35-39 years                         | 491,861      | 192,738      | 5.42         | 5.36         |
| 40-44 years                         | 524,531      | 201,368      | 5.78         | 5.6          |
| 45-49 years                         | 525,438      | 199,211      | 5.79         | 5.54         |
| 50-54 years                         | 477,341      | 178,714      | 5.26         | 4.97         |
| 55-59 years                         | 393,852      | 146,352      | 4.34         | 4.07         |
| 60-64 years                         | 362,090      | 135,924      | 3.99         | 3.78         |
| 65-69 years                         | 378,424      | 142,396      | 4.17         | 3.96         |
| 70-74 years                         | 347,570      | 130,170      | 3.83         | 3.62         |
| 75-79 years                         | 378,424      | 141,317      | 4.17         | 3.93         |
| 80-84 years                         | 383,869      | 143,475      | 4.23         | 3.99         |
| 85-89 years                         | 312,178      | 118,663      | 3.44         | 3.3          |
| 90-94 years                         | 176,054      | 68,321       | 1.94         | 1.9          |
| 95-99 years                         | 40,837       | 16,181       | 0.45         | 0.45         |
| 100+ years                          | 6,352        | 2,517        | 0.07         | 0.07         |
| <i>Ethnic group</i>                 |              |              |              |              |
| Unknown                             | 1,247,803    | 509,893      | 13.75        | 14.18        |
| White                               | 6,565,710    | 2,591,536    | 72.35        | 72.07        |
| Mixed                               | 118,882      | 47,465       | 1.31         | 1.32         |
| Asian                               | 550,848      | 220,426      | 6.07         | 6.13         |
| Black                               | 336,680      | 125,136      | 3.71         | 3.48         |
| Other                               | 255,005      | 101,403      | 2.81         | 2.82         |
| <i>Quintile of area deprivation</i> |              |              |              |              |
| 1 (most deprived)                   | 2,570,020    | 988,502      | 28.32        | 27.49        |
| 2                                   | 2,038,229    | 795,764      | 22.46        | 22.13        |
| 3                                   | 1,672,509    | 665,953      | 18.43        | 18.52        |
| 4                                   | 1,477,398    | 600,149      | 16.28        | 16.69        |

|                                              |           |           |       |       |
|----------------------------------------------|-----------|-----------|-------|-------|
| 5 (least deprived)                           | 1,316,772 | 545,492   | 14.51 | 15.17 |
| <i>Arrival mode</i>                          |           |           |       |       |
| By ambulance                                 | 2,727,016 | 1,120,470 | 30.05 | 31.16 |
| Other                                        | 6,308,890 | 2,463,524 | 69.52 | 68.51 |
| Not known                                    | 38,115    | 11,866    | 0.42  | 0.33  |
| <i>Incident location</i>                     |           |           |       |       |
| Home                                         | 4,523,852 | 1,886,029 | 49.85 | 52.45 |
| Work                                         | 343,940   | 64,366    | 3.79  | 1.79  |
| Educational establishment                    | 217,798   | 12,226    | 2.4   | 0.34  |
| Public place                                 | 829,448   | 411,366   | 9.14  | 11.44 |
| Other                                        | 2,333,164 | 897,527   | 25.71 | 24.96 |
| Not known                                    | 826,726   | 324,706   | 9.11  | 9.03  |
| <i>Referral source</i>                       |           |           |       |       |
| General medical practitioner                 | 664,285   | 84,143    | 7.32  | 2.34  |
| Self-referral                                | 5,447,679 | 2,302,429 | 60.03 | 64.03 |
| Local authority social services              | 7,260     | 3,236     | 0.08  | 0.09  |
| Emergency services                           | 1,185,186 | 503,780   | 13.06 | 14.01 |
| Work                                         | 63,524    | 11,507    | 0.7   | 0.32  |
| Educational establishment                    | 36,300    | 1,798     | 0.4   | 0.05  |
| Police                                       | 43,560    | 23,733    | 0.48  | 0.66  |
| Other health care provider                   | 345,755   | 144,913   | 3.81  | 4.03  |
| Other                                        | 1,183,371 | 485,441   | 13.04 | 13.5  |
| Not known                                    | 98,917    | 34,880    | 1.09  | 0.97  |
| <i>Diagnosis category</i>                    |           |           |       |       |
| Laceration                                   | 302,195   | 138,441   | 3.33  | 3.85  |
| Contusion/abrasion                           | 251,376   | 93,852    | 2.77  | 2.61  |
| Soft tissue inflammation                     | 299,473   | 110,033   | 3.3   | 3.06  |
| Head injury                                  | 190,573   | 83,064    | 2.1   | 2.31  |
| Dislocation/fracture/joint injury/amputation | 444,671   | 176,916   | 4.9   | 4.92  |
| Sprain/ligament injury                       | 352,107   | 124,776   | 3.88  | 3.47  |
| Muscle/tendon injury                         | 128,864   | 46,027    | 1.42  | 1.28  |
| Nerve injury                                 | 65,339    | 25,890    | 0.72  | 0.72  |
| Vascular injury                              | 5,445     | 1,798     | 0.06  | 0.05  |
| Burns and scalds                             | 42,652    | 18,698    | 0.47  | 0.52  |
| Electric shock                               | 5,445     | 2,158     | 0.06  | 0.06  |
| Foreign body                                 | 68,062    | 23,733    | 0.75  | 0.66  |
| Bites/stings                                 | 29,947    | 15,462    | 0.33  | 0.43  |
| Poisoning (inc overdose)                     | 97,102    | 45,667    | 1.07  | 1.27  |
| Near drowning                                | 907       | 360       | 0.01  | 0.01  |
| Visceral injury                              | 2,722     | 1,079     | 0.03  | 0.03  |
| Infectious disease                           | 80,767    | 36,678    | 0.89  | 1.02  |
| Local infection                              | 118,882   | 51,780    | 1.31  | 1.44  |
| Septicaemia                                  | 20,872    | 8,630     | 0.23  | 0.24  |
| Cardiac conditions                           | 282,230   | 95,650    | 3.11  | 2.66  |

|                                                           |           |           |       |       |
|-----------------------------------------------------------|-----------|-----------|-------|-------|
| Cerebro-vascular conditions                               | 63,524    | 23,014    | 0.7   | 0.64  |
| Other vascular conditions                                 | 43,560    | 13,664    | 0.48  | 0.38  |
| Haematological conditions                                 | 24,502    | 7,551     | 0.27  | 0.21  |
| Central nervous system conditions (exc stroke)            | 156,089   | 56,455    | 1.72  | 1.57  |
| Respiratory conditions                                    | 297,658   | 125,136   | 3.28  | 3.48  |
| Gastrointestinal conditions                               | 417,447   | 162,892   | 4.6   | 4.53  |
| Urological conditions (inc cystitis)                      | 178,776   | 72,996    | 1.97  | 2.03  |
| Obstetric conditions                                      | 27,225    | 10,788    | 0.3   | 0.3   |
| Gynaecological conditions                                 | 71,692    | 28,048    | 0.79  | 0.78  |
| Diabetes and other endocrinological conditions            | 32,670    | 12,226    | 0.36  | 0.34  |
| Dermatological conditions                                 | 39,930    | 19,418    | 0.44  | 0.54  |
| Allergy (inc anaphylaxis)                                 | 34,485    | 16,541    | 0.38  | 0.46  |
| Facio-maxillary conditions                                | 25,410    | 13,664    | 0.28  | 0.38  |
| ENT conditions                                            | 111,622   | 50,342    | 1.23  | 1.4   |
| Psychiatric conditions                                    | 87,119    | 34,161    | 0.96  | 0.95  |
| Ophthalmological conditions                               | 99,824    | 40,993    | 1.1   | 1.14  |
| Social problems (inc chronic alcoholism and homelessness) | 22,687    | 10,068    | 0.25  | 0.28  |
| Diagnosis not classifiable                                | 1,349,442 | 531,468   | 14.87 | 14.78 |
| Nothing abnormal detected                                 | 206,001   | 84,143    | 2.27  | 2.34  |
| Missing                                                   | 2,996,541 | 1,181,959 | 33.02 | 32.87 |

## Appendix 2: Descriptive statistics for direct admissions

| Variable            | Weekday | Weekend | Weekday | Weekend |
|---------------------|---------|---------|---------|---------|
|                     | n       | n       | %       | %       |
| Observations        | 817,024 | 123,835 | 100.00  | 100.00  |
| Female              | 441,520 | 67,180  | 54.04   | 54.25   |
| <i>Age category</i> |         |         |         |         |
| <1 year             | 51,799  | 10,699  | 6.34    | 8.64    |
| 1-4 years           | 54,414  | 12,161  | 6.66    | 9.82    |
| 5-9 years           | 22,141  | 4,520   | 2.71    | 3.65    |
| 10-14 years         | 19,037  | 2,923   | 2.33    | 2.36    |
| 15-19 years         | 24,184  | 4,235   | 2.96    | 3.42    |
| 20-24 years         | 34,887  | 6,217   | 4.27    | 5.02    |
| 25-29 years         | 36,276  | 6,056   | 4.44    | 4.89    |
| 30-34 years         | 35,704  | 5,560   | 4.37    | 4.49    |
| 35-39 years         | 30,965  | 4,594   | 3.79    | 3.71    |
| 40-44 years         | 34,805  | 4,966   | 4.26    | 4.01    |
| 45-49 years         | 38,809  | 5,201   | 4.75    | 4.2     |
| 50-54 years         | 39,871  | 5,152   | 4.88    | 4.16    |
| 55-59 years         | 39,544  | 4,842   | 4.84    | 3.91    |
| 60-64 years         | 45,672  | 5,535   | 5.59    | 4.47    |
| 65-69 years         | 56,538  | 6,811   | 6.92    | 5.5     |
| 70-74 years         | 55,639  | 6,737   | 6.81    | 5.44    |
| 75-79 years         | 61,195  | 7,517   | 7.49    | 6.07    |
| 80-84 years         | 60,215  | 8,148   | 7.37    | 6.58    |

|             |        |       |      |      |
|-------------|--------|-------|------|------|
| 85-89 years | 46,407 | 6,972 | 5.68 | 5.63 |
| 90-94 years | 23,612 | 4,000 | 2.89 | 3.23 |
| 95-99 years | 4,739  | 879   | 0.58 | 0.71 |
| 100+ years  | 572    | 124   | 0.07 | 0.1  |

*Ethnic group*

|         |         |         |       |       |
|---------|---------|---------|-------|-------|
| White   | 698,147 | 105,074 | 85.45 | 84.85 |
| Mixed   | 7,435   | 1,313   | 0.91  | 1.06  |
| Asian   | 35,622  | 6,068   | 4.36  | 4.9   |
| Black   | 11,030  | 1,474   | 1.35  | 1.19  |
| Other   | 9,069   | 1,375   | 1.11  | 1.11  |
| Unknown | 55,721  | 8,532   | 6.82  | 6.89  |

*Quintile of area deprivation*

|                    |         |        |       |       |
|--------------------|---------|--------|-------|-------|
| 1 (most deprived)  | 191,020 | 29,671 | 23.38 | 23.96 |
| 2                  | 165,284 | 25,176 | 20.23 | 20.33 |
| 3                  | 165,284 | 25,052 | 20.23 | 20.23 |
| 4                  | 155,725 | 23,095 | 19.06 | 18.65 |
| 5 (least deprived) | 139,711 | 20,841 | 17.1  | 16.83 |

*Admission method*

|                   |         |         |       |       |
|-------------------|---------|---------|-------|-------|
| GP                | 633,275 | 102,709 | 77.51 | 82.94 |
| Bed bureau        | 64,627  | 11,529  | 7.91  | 9.31  |
| Consultant clinic | 119,204 | 9,597   | 14.59 | 7.75  |

*SHMI diagnosis group (138 in total, 10 most common on weekday and/or weekend listed)*

|                                                                     |        |       |      |      |
|---------------------------------------------------------------------|--------|-------|------|------|
| Abdominal pain                                                      | 48,531 | 8,235 | 5.94 | 6.65 |
| Influenza and other upper respiratory infections...                 | 41,913 | 8,334 | 5.13 | 6.73 |
| Headache and eye disorders                                          | 29,658 | 3,740 | 3.63 | 3.02 |
| Complications of fertility and pregnancy                            | 29,331 | 4,359 | 3.59 | 3.52 |
| Skin and subcutaneous infections                                    | 26,390 | 4,161 | 3.23 | 3.36 |
| Acute bronchitis                                                    | 25,164 | 4,891 | 3.08 | 3.95 |
| Other connective tissue disease                                     | 24,919 | 2,340 | 3.05 | 1.89 |
| Nonspecific chest pain                                              | 24,592 | 2,142 | 3.01 | 1.73 |
| Urinary tract infections                                            | 23,040 | 5,077 | 2.82 | 4.1  |
| Hepatitis and sexually transmitted infections                       | 22,386 | 4,978 | 2.74 | 4.02 |
| Intestinal infections                                               | 22,223 | 5,275 | 2.72 | 4.26 |
| Pneumonia (excluding tuberculosis and sexually transmitted disease) | 22,141 | 4,012 | 2.71 | 3.24 |

*Elixhauser conditions*

|                                 |         |        |       |       |
|---------------------------------|---------|--------|-------|-------|
| Congestive heart failure        | 30,965  | 3,926  | 3.79  | 3.17  |
| Cardiac arrhythmias             | 78,598  | 10,514 | 9.62  | 8.49  |
| Valvular disease                | 21,569  | 2,365  | 2.64  | 1.91  |
| Pulmonary circulation disorders | 5,392   | 582    | 0.66  | 0.47  |
| Peripheral vascular disorders   | 16,831  | 1,895  | 2.06  | 1.53  |
| Hypertension, uncomplicated     | 179,827 | 22,340 | 22.01 | 18.04 |
| Hypertension, complicated       | 980     | 124    | 0.12  | 0.1   |
| Paralysis                       | 4,984   | 842    | 0.61  | 0.68  |

|                                                 |         |        |       |       |
|-------------------------------------------------|---------|--------|-------|-------|
| Other neurological disorders                    | 26,717  | 4,347  | 3.27  | 3.51  |
| Chronic pulmonary disease                       | 110,053 | 14,390 | 13.47 | 11.62 |
| Diabetes, uncomplicated                         | 85,216  | 11,294 | 10.43 | 9.12  |
| Diabetes, complicated                           | 9,804   | 892    | 1.2   | 0.72  |
| Hypothyroidism                                  | 32,599  | 4,409  | 3.99  | 3.56  |
| Renal failure                                   | 62,257  | 6,353  | 7.62  | 5.13  |
| Liver disease                                   | 14,788  | 1,709  | 1.81  | 1.38  |
| Peptic ulcer disease excluding bleeding         | 1,797   | 248    | 0.22  | 0.2   |
| Lymphoma                                        | 5,066   | 854    | 0.62  | 0.69  |
| Metastatic cancer                               | 27,125  | 3,913  | 3.32  | 3.16  |
| Solid tumour without metastasis                 | 35,541  | 5,374  | 4.35  | 4.34  |
| Rheumatoid arthritis/collagen vascular diseases | 21,079  | 2,650  | 2.58  | 2.14  |
| Congulopathy                                    | 4,902   | 681    | 0.6   | 0.55  |
| Obesity                                         | 14,461  | 1,833  | 1.77  | 1.48  |
| Weight loss                                     | 10,785  | 1,090  | 1.32  | 0.88  |
| Fluid and electrolyte disorders                 | 34,233  | 5,610  | 4.19  | 4.53  |
| Blood loss anaemia                              | 409     | 50     | 0.05  | 0.04  |
| Deficiency anaemia                              | 12,827  | 1,560  | 1.57  | 1.26  |
| Alcohol abuse                                   | 19,037  | 2,402  | 2.33  | 1.94  |
